# Supplementary material for: Common Breast Cancer Susceptibility Alleles and the Risk of Breast Cancer for BRCA1 and BRCA2 Mutation Carriers: Implications for Risk Prediction
Source: Oxford University Press journal article supplement (doi:10.1158/0008-5472.can-10-1907), 2010-11-30
Supplement: 00085472can101907-sup-can_12-1-10_antoniou.pdf [file 00085472can101907-sup-can_12-1-10_antoniou.pdf]

## **Common breast cancer susceptibility alleles and the risk of breast cancer for *BRCA1* and *BRCA2* mutation carriers: implications for risk prediction**

### **Supplementary material**

#### **Appendix 1**

##### **Genotyping Quality Control**

Genotyping was performed using either the iPLEX or Taqman platforms. To ensure genotyping consistency, included at least 2% of the samples in duplicate, no template controls in every plate, and a random mixture of affected and unaffected carriers. Samples that failed for two or more of the SNPs genotyped (or  $\geq 20\%$  of the SNPs typed if more than three SNPs were analysed in that genotyping round) were excluded from the analysis. The genotype data for a given SNP and a given study were included in the analysis only if the call rate was  $>95\%$  after samples that failed at multiple SNPs had been excluded. The concordance between duplicates had to be at least 98%. To assess the accuracy of genotyping across genotyping centers, all centers genotyped 95 DNA samples from a standard test plate (Coriell Institute) for all SNPs. If the genotyping was inconsistent for more than one sample in the test plate, the study was excluded from the analysis of that SNP. As an additional genotyping quality-control check, we also evaluated the deviation from Hardy-Weinberg equilibrium (HWE) for unrelated subjects separately for each SNP and study. Studies with a HWE p-value of less than 0.005 were excluded from the analysis. If HWE p-values were in the range 0.005-0.05 we examined the genotyping cluster plots; none revealed any unusual patterns and these studies were therefore included in all the analyses. For the three novel polymorphisms investigated, one study failed the quality control criteria and was excluded from the analysis of the rs4973768 (*SLC4A7/NEK10*) polymorphism and five studies were excluded from the

analysis of the rs10941679 (5p12) SNP. No studies were excluded from the analysis of the rs6504950 (*STXBP4/COX11*) SNP.

A number of samples (3344 - 5150 mutation carriers depending on SNP) were re-genotyped by iPLEX for the six previously published SNPs in a multiplex along with the new SNPs, as part of the effort to genotype additional samples from mutation carriers who were recruited subsequent to the original reports. Samples with inconsistent genotypes between the two genotyping rounds were excluded from the analysis of each polymorphism (discordance rate: 0.002-0.006 depending on the SNP).

## Appendix 2

To evaluate the combined effects of the significant SNPs on breast cancer risk, for each pair of SNPs we fitted models of the form:  $\lambda(t) = \lambda_0(t) \exp(\beta_1 x_1 + \beta_2 x_2 + \gamma x_1 x_2)$  where  $\beta_1$  is the per-allele log-hazard ratio for SNP1,  $\beta_2$  is the per-allele log-hazard ratio for SNP2,  $\gamma$  is a term for the interaction between SNP1 and SNP2 and  $x_1, x_2$  represent the number of minor alleles at locus 1 and 2 respectively (e.g. 0,1,2). To test for interactions between a pair of SNPs, we tested for the significance of the interaction parameter (i.e.  $\gamma \neq 0$ ).

### *Implications for risk predictions*

We estimated the absolute risk of developing breast cancer based on the joint distribution of all SNPs that were significantly associated with risk for either *BRCA1* or *BRCA2* mutation carriers. To do this, we assumed that the average, age-specific breast cancer incidences for *BRCA1* and *BRCA2* mutation carriers, over all modifying loci, agreed with published penetrance estimates for *BRCA1* and *BRCA2* (1). Under this model, and assuming independence between the SNPs, the breast cancer incidence  $\lambda(t, X)$  at age  $t$  for a mutation carrier with genotype vector  $\mathbf{X} = (x_1, x_2, \dots, x_n)$  at loci 1 to  $n$ , depends on the underlying genotypes according to:  $\lambda(t, X) = \lambda_0(t) \exp(\beta^t X)$  where  $\lambda_0(t)$  is the baseline incidence and  $\beta = (\beta_1, \beta_2, \dots, \beta_n)$  is the vector of logHRs estimates for SNPs 1 to  $n$ .  $\lambda_0(t)$  is unknown.  $\exp(\beta^t X)$  represents the combined HR across all loci. If  $\mu(t)$  is the average incidence at age  $t$  obtained from published studies, then:

$$\mu(t) = \frac{\sum_i p(X_i) \lambda(t, X_i) S(t-1, X_i)}{\sum_i p(X_i) S(t-1, X_i)} \quad (1).$$

$p(X_i)$  is the probability of multilocus genotype  $i$  ( $i=1, \dots, 3^n$ ) and under the assumption of linkage equilibrium between the SNPs  $p(X_i) = \prod_{j=1}^n q(x_{ij})$  with  $q(x_{ij})$  being the genotype frequency at locus  $j$  of the  $i^{\text{th}}$  multilocus genotype. Under HWE for someone with 2, 1 or 0 minor alleles at locus  $j$ ,  $q(x_{ij}) = \alpha_j^2, 2\alpha_j(1 - \alpha_j)$  or  $(1 - \alpha_j)^2$  respectively, where  $\alpha_j$  is the minor allele frequency at locus  $j$ .  $S(t, X_i)$  is the survival function to age  $t$  for an individual with a multilocus genotype  $\mathbf{X}$ , which can be expressed in terms of the baseline incidence and the logHRs according to standard survival analysis theory(2). Assuming  $S(0, X_i) = 1$  for all genotypes, it is possible to solve recursively for  $\lambda_0(t)$  and hence obtain the age-specific breast cancer incidence for each multilocus genotype  $\lambda(t, \mathbf{X})$ . In these calculations, we used minor allele frequency estimates based on control data from population based studies (3-6) and the logHR estimates obtained from the present analysis. As an alternative, we used the estimated log(per-allele odds ratios) from the largest published population-based studies. To further evaluate the departure from the multiplicative model for the combined effects of all SNPs, we derived a risk score under the assumption of independence based on the HR estimated from the analysis of each SNP (that is, the risk score was of the form  $\exp(\beta^t X)$ ). We then estimated the HR associated with the quantiles of the distribution of the risk score and compared those against the HR predicted under the multiplicative model.

**Supplementary Figure 1 legend:** **A.** Cumulative distribution function of the combined HR for breast cancer risk for *BRCA2* mutation carriers based on the Odds Ratio estimates from population based studies for all nine SNPs. **B.** Predicted cumulative risk of developing breast cancer by age 80 for *BRCA2* mutation carriers by the combined HR at the above SNPs.

Supplementary Table 1: *BRCA1* and *BRCA2* mutation carriers genotyped for at least one SNP by study

| <b>Study</b>                                                                                      | <b>Country</b>          | <b>BRCA1</b> | <b>BRCA2</b> |
|---------------------------------------------------------------------------------------------------|-------------------------|--------------|--------------|
| Breast Cancer Family Registry (BCFR)                                                              | USA, Canada, Australia  | 512          | 366          |
| Baltic Familial Breast and Ovarian Cancer Consortium (BFBOCC)                                     | Latvia, Lithuania       | 102          | 0            |
| Copenhagen Breast Cancer Study (CBCS)                                                             | Denmark                 | 175          | 88           |
| Spanish National Cancer Centre (CNIO)                                                             | Spain, Greece           | 254          | 334          |
| CONsorzio Studi Italiani sui Tumori Ereditari Alla Mammella (CONSIT TEAM)                         | Italy                   | 525          | 325          |
| Deutsches Krebsforschungszentrum (DKFZ)                                                           | Germany                 | 69           | 30           |
| HEreditary Breast and Ovarian study Netherlands (HEBON)                                           | The Netherlands         | 796          | 304          |
| EMBRACE                                                                                           | UK and Eire             | 999          | 840          |
| Fox Chase Cancer Centre (FCCC)                                                                    | USA                     | 82           | 54           |
| German Consortium of Hereditary Breast and Ovarian Cancer (GC-HBOC)                               | Germany                 | 985          | 467          |
| Genetic Modifiers of cancer risk in <i>BRCA1/2</i> mutation carriers (GEMO)                       | France, USA             | 1203         | 599          |
| Georgetown University                                                                             | USA                     | 31           | 17           |
| Gynecologic Oncology Group (GOG)                                                                  | USA                     | 390          | 277          |
| Hospital Clinico San Carlos (HCSC)                                                                | Spain                   | 132          | 119          |
| Helsinki Breast Cancer Study (HEBCS)                                                              | Finland                 | 103          | 105          |
| Institut Català d'Oncologia (ICO)                                                                 | Spain                   | 112          | 119          |
| International Hereditary Cancer Centre (IHCC)                                                     | Poland                  | 350          | 0            |
| Iceland Landspítali - University Hospital (ILUH)                                                  | Iceland                 | 0            | 135          |
| Interdisciplinary Health Research International Team Breast Cancer Susceptibility (INHERIT BRCAs) | Canada                  | 73           | 82           |
| Istituto Oncologico Veneto Hereditary Breast and Ovarian Cancer Study (IOVHBOCS)                  | Italy                   | 118          | 108          |
| kConFab                                                                                           | Australia               | 595          | 488          |
| MAGIC                                                                                             | USA                     | 554          | 313          |
| Mayo Clinic (MAYO)                                                                                | USA                     | 243          | 132          |
| Modifier Study of Quantitative Effects on Disease (ModSQuaD)                                      | Czech Republic, Belgium | 324          | 147          |
| Memorial Sloane Kettering Cancer Center (MSKCC)                                                   | USA                     | 289          | 211          |
| Medical University Vienna (MUV)                                                                   | Austria                 | 278          | 120          |
| National Cancer Institute (NCI)                                                                   | USA                     | 172          | 77           |
| National Israeli Cancer Control Center (NICCC)                                                    | Israel                  | 340          | 220          |
| N.N. Petrov Institute of Oncology (NNPIO)                                                         | Russia                  | 93           | 0            |
| Ontario Cancer Genetics Network (OCGN)                                                            | Canada                  | 227          | 172          |
| Ohio State University Clinical Cancer Center (OSU CCG)                                            | USA                     | 87           | 49           |
| Odense University Hospital (OUH)                                                                  | Denmark                 | 268          | 195          |
| Pisa Breast Cancer Study (PBCS)                                                                   | Italy                   | 88           | 57           |
| Sheba Medical Centre (SMC)- Tel Hashomer                                                          | Israel                  | 614          | 301          |
| Swedish Breast Cancer Study (SWE-BRCA)                                                            | Sweden                  | 537          | 177          |
| University of California Irvine (UCI)                                                             | USA                     | 172          | 125          |
| UK and Gilda Radner Familial Ovarian Cancer Registries (UKGRFOCR)                                 | USA, UK                 | 161          | 35           |
| University of Pennsylvania (UPENN)                                                                | USA                     | 313          | 152          |
| Women's Cancer Research Institute (WCRI)                                                          | USA                     | 159          | 69           |
| <b>Total</b>                                                                                      |                         | <b>12525</b> | <b>7409</b>  |

Supplementary Table 2: Hazard Ratio estimates after excluding prevalent cancer cases

| <b>Mutation/SNP</b>     | <b>Unaffected/Affected</b> | <b>HR*</b> | <b>95% CI</b> | <b>p-value*</b> |
|-------------------------|----------------------------|------------|---------------|-----------------|
| <i>SLC4A7</i> rs4973768 |                            |            |               |                 |
| <i>BRCA1</i>            | 4427/2528                  | 1.04       | 0.97-1.13     | 0.25            |
| <i>BRCA2</i>            | 2639/1700                  | 1.10       | 1.01-1.19     | 0.032           |
| <i>STXBP4</i> rs6504950 |                            |            |               |                 |
| <i>BRCA1</i>            | 4466/2574                  | 1.04       | 0.97-1.11     | 0.32            |
| <i>BRCA2</i>            | 2666/1720                  | 1.02       | 0.92-1.12     | 0.74            |
| 5p12 rs10941679         |                            |            |               |                 |
| <i>BRCA1</i>            | 4040/2430                  | 0.99       | 0.92-1.07     | 0.82            |
| <i>BRCA2</i>            | 2458/1649                  | 1.08       | 0.98-1.20     | 0.13            |
| <i>BRCA2</i>            | 2458/1649                  | 1.13       | 1.00-1.28     | 0.052           |
| dominant                |                            |            |               |                 |

\*Multiplicative model unless specified

**Supplementary Table 3:** Pairwise interaction Hazard Ratio estimates and significance tests

| Locus1       | Locus2 | Unaffected | Breast Cancer cases | HR   | 95%CI     | p-interaction |
|--------------|--------|------------|---------------------|------|-----------|---------------|
| <b>BRCA1</b> |        |            |                     |      |           |               |
| TNRC9        | 2q35   | 3367       | 4117                | 1.09 | 0.95-1.24 | 0.22          |
| <b>BRCA2</b> |        |            |                     |      |           |               |
| FGFR2        | TNRC9  | 2046       | 2558                | 1.09 | 0.98-1.20 | 0.10          |
| FGFR2        | MAP3K1 | 2154       | 2706                | 0.94 | 0.85-1.03 | 0.17          |
| FGFR2        | LSP1   | 1989       | 2525                | 1.00 | 0.90-1.09 | 0.85          |
| FGFR2        | 2q35   | 1975       | 2523                | 1.02 | 0.87-1.18 | 0.82          |
| FGFR2        | SLC4A7 | 1874       | 2408                | 0.98 | 0.89-1.07 | 0.64          |
| FGFR2        | 5p12   | 1847       | 2406                | 1.04 | 0.92-1.19 | 0.53          |
| TNRC9        | MAP3K1 | 2127       | 2669                | 0.93 | 0.84-1.03 | 0.14          |
| TNRC9        | LSP1   | 1904       | 2408                | 1.04 | 0.66-1.63 | 0.86          |
| TNRC9        | 2q35   | 1927       | 2465                | 1.11 | 0.94-1.30 | 0.22          |
| TNRC9        | SLC4A7 | 1823       | 2331                | 0.96 | 0.86-1.06 | 0.40          |
| TNRC9        | 5p12   | 1806       | 2335                | 1.09 | 0.64-1.84 | 0.75          |
| MAP3K1       | LSP1   | 2043       | 2565                | 0.96 | 0.86-1.07 | 0.45          |
| MAP3K1       | 2q35   | 2067       | 2621                | 1.06 | 0.90-1.23 | 0.48          |
| MAP3K1       | SLC4A7 | 1949       | 2483                | 1.02 | 0.93-1.13 | 0.64          |
| MAP3K1       | 5p12   | 1925       | 2478                | 0.95 | 0.83-1.10 | 0.52          |
| LSP1         | 2q35   | 2531       | 3149                | 1.03 | 0.90-1.18 | 0.68          |
| LSP1         | SLC4A7 | 2285       | 2888                | 0.92 | 0.84-1.01 | 0.07          |
| LSP1         | 5p12   | 2213       | 2827                | 0.97 | 0.85-1.10 | 0.61          |
| 2q35         | SLC4A7 | 2329       | 2961                | 1.10 | 0.96-1.26 | 0.17          |
| 2q35         | 5p12   | 2257       | 2899                | 0.87 | 0.72-1.06 | 0.17          |
| SLC4A7       | 5p12   | 2562       | 3231                | 1.03 | 0.92-1.15 | 0.60          |

## Reference List

- (1) Antoniou AC, Cunningham AP, Peto J, et al. The BOADICEA model of genetic susceptibility to breast and ovarian cancers: updates and extensions. *Br J Cancer* 2008;98:1457-66.
- (2) Cox DR, Oakes D. Analysis of survival data. London: Chapman and Hall; 1984.
- (3) Ahmed S, Thomas G, Ghoussaini M, et al. Newly discovered breast cancer susceptibility loci on 3p24 and 17q23.2. *Nat Genet* 2009;41:585-90.
- (4) Easton DF, Pooley KA, Dunning AM, et al. Genome-wide association study identifies novel breast cancer susceptibility loci. *Nature* 2007;447:1087-93.
- (5) Milne RL, Osorio A, Cajal TR, et al. The Average Cumulative Risks of Breast and Ovarian Cancer for Carriers of Mutations in BRCA1 and BRCA2 Attending Genetic Counseling Units in Spain. *Clin Cancer Res* 2008;14:2861-9.
- (6) Stacey SN, Manolescu A, Sulem P, et al. Common variants on chromosome 5p12 confer susceptibility to estrogen receptor-positive breast cancer. *Nat Genet* 2008;40:703-6.

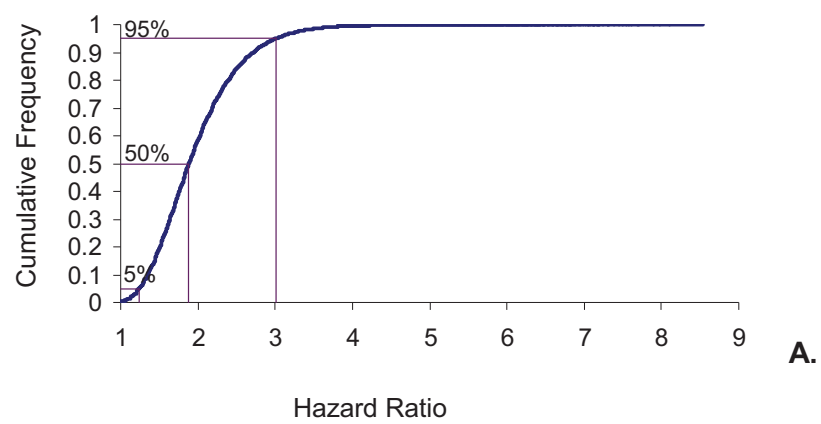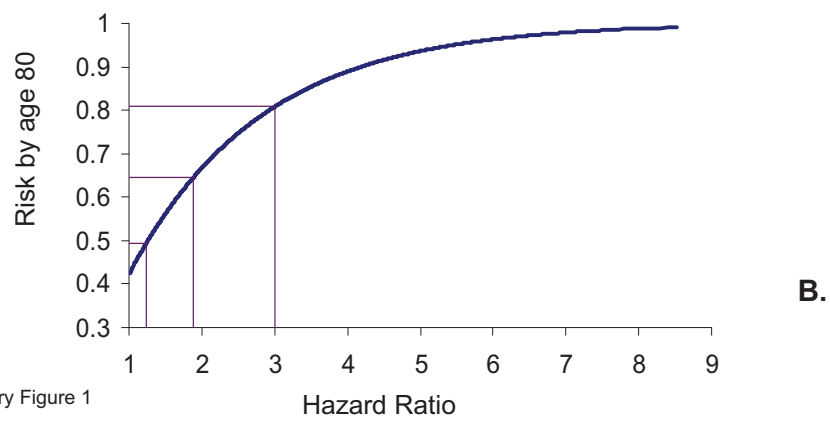

Supplementary Figure 1
